# Supplementary material for: Integration of focal adhesion morphogenesis and polarity by DOCK5 promotes YAP/TAZ-driven drug resistance in TNBC
Source: Royal Society of Chemistry journal article supplement (doi:10.1039/d4mo00154k), 2025-05-12

Supplementary Figure 7. Automated segmentation for Collagen Invasion Quantification

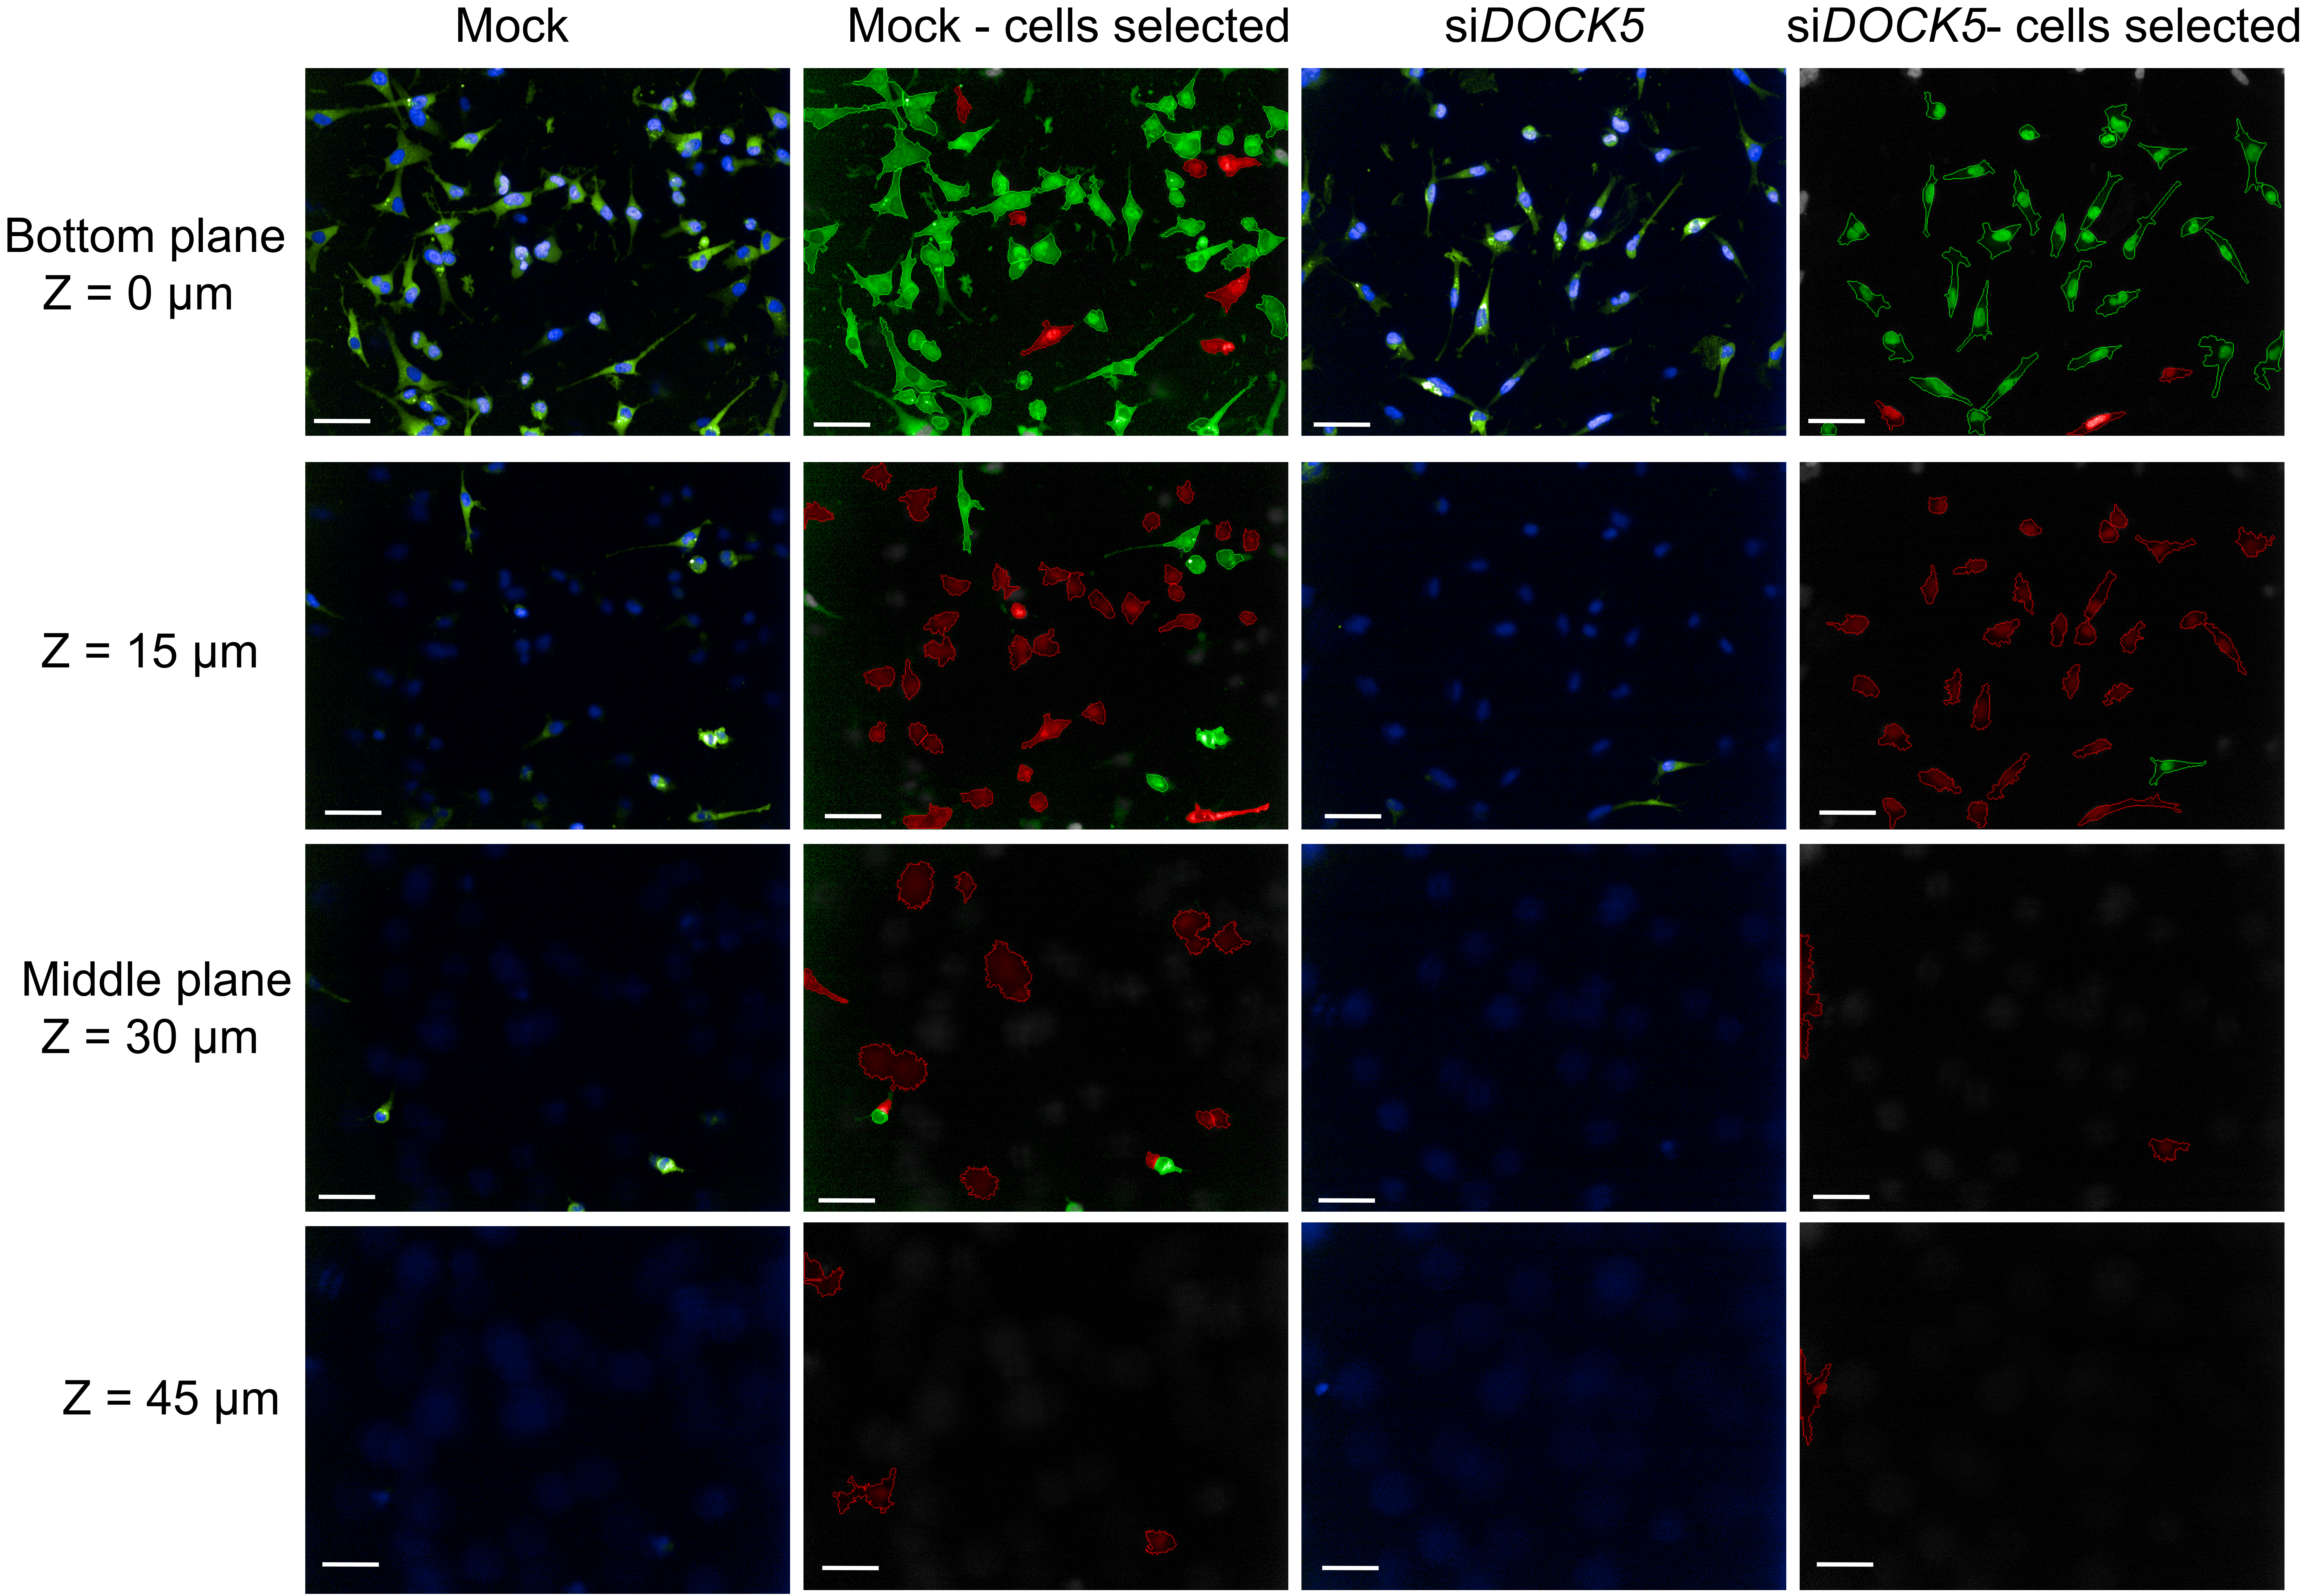

Supplement: d4mo00154k7.pdf [file d4mo00154k7.pdf]
